# Supplementary material for: Southern hemispheric halon trends and global halon emissions, 1978–2011
Source: Copernicus journal article supplement (doi:10.5194/acp-13-5551-2013), 2013-06-06
Supplement: Supplementary file 2 [file Halons_Supplement 28 02 13.xlsx]

## Sheet: Table S1
Table S1. Model fit trends at Cape Grim inferred from measurements from 1978 - 2011.
			Cape Grim Mixing Ratio from Model Fit [ppt]				Measurement Uncertainty Average [ppt]
		Year	H-1301	H-1211	H-1202	H-2402	H-1301	H-1211	H-1202	H-2402
		1978	0.2	0.42	0.007	0.09	0.01	0.008	0.001	0.004
		1979	0.25	0.51	0.008	0.11	0.01	0.016	0	0.003
		1980	0.32	0.61	0.009	0.12	0.024	0.012	0.001	0.006
		1981	0.39	0.73	0.01	0.14	0.017	0.013	0.001	0.006
		1982	0.46	0.86	0.011	0.16	0.009	0.013	0	0.006
		1983	0.54	0.99	0.012	0.17	0.011	0.011	0.001	0.008
		1984	0.64	1.13	0.013	0.19	0.02	0.013	0.001	0.007
		1985	0.76	1.28	0.014	0.21	0.028	0.014	0.001	0.007
		1986	0.91	1.46	0.016	0.23	0.018	0.014	0	0.007
		1987	1.11	1.64	0.018	0.24	0.043	0.014	0.001	0.007
		1988	1.32	1.82	0.02	0.26	0.022	0.019	0.001	0.006
		1989	1.52	2	0.021	0.28	0.027	0.023	0.001	0.006
		1990	1.69	2.18	0.022	0.31	0.042	0.022	0.001	0.006
		1991	1.84	2.36	0.023	0.33	0.027	0.029	0.001	0.008
		1992	1.98	2.56	0.024	0.35	0.044	0.025	0.001	0.008
		1993	2.12	2.75	0.026	0.37	0.046	0.034	0.001	0.01
		1994	2.25	2.94	0.028	0.39	0.042	0.048	0.001	0.01
		1995	2.36	3.15	0.032	0.4	0.053	0.051	0.001	0.008
		1996	2.45	3.36	0.037	0.41	0.047	0.03	0.001	0.009
		1997	2.52	3.54	0.04	0.42	0.042	0.032	0.001	0.007
		1998	2.6	3.67	0.043	0.42	0.053	0.041	0.001	0.008
		1999	2.67	3.8	0.045	0.42	0.055	0.04	0.001	0.008
		2000	2.73	3.92	0.046	0.42	0.043	0.042	0.001	0.008
		2001	2.78	4	0.045	0.42	0.053	0.041	0.001	0.009
		2002	2.82	4.07	0.043	0.42	0.032	0.043	0.001	0.006
		2003	2.87	4.12	0.041	0.42	0.057	0.051	0.001	0.009
		2004	2.93	4.17	0.038	0.42	0.049	0.052	0.002	0.011
		2005	2.99	4.2	0.035	0.42	0.062	0.039	0.001	0.003
		2006	3.03	4.2	0.032	0.41	0.059	0.04	0.001	0.006
		2007	3.06	4.18	0.029	0.41	0.077	0.035	0.001	0.003
		2008	3.09	4.14	0.026	0.4	0.049	0.047	0.001	0.006
		2009	3.11	4.1	0.024	0.4	0.017	0.019	0.001	0.003
		2010	3.14	4.04	0.021	0.4	0.023	0.013	0.001	0.004
		2011	3.16	3.97	0.019	0.39	0.03	0.036	0.001	0.006

## Sheet: Table S2
Table S2. Measured mixing ratios at Cape Grim from 1978 - 2011
			Cape Grim Mixing Ratio [ppt]												Measurement Uncertainty [ppt]
		Year	H-1301			H-1211			H-1202			H-2402			H-1301			H-1211			H-1202			H-2402
		GC-Column	Chrompak	Agilent	GasPro	Chrompak	Agilent	GasPro	Chrompak	Agilent	GasPro	Chrompak	Agilent	GasPro	Chrompak	Agilent	GasPro	Chrompak	Agilent	GasPro	Chrompak	Agilent	GasPro	Chrompak	Agilent	GasPro
		1978-04-26	0.176546	0.217163			0.414824			0.0070114			0.0909934		0.00294276	0.0120568			0.00613008			0.000724773			0.00259003
		1978-07-07	0.171051		0.209908			0.441616	0.00646406		0.00730213			0.0970394	0.00290042		0.0135747			0.0101422	0.000345052		0.0016577			0.00471335
		1978-10-30	0.277361						0.00781501						0.0162257						0.000306887
		1979-02-06	0.246782	0.229955			0.497487		0.00778631	0.00800376			0.106785		0.00671325	0.0142936			0.0155389		0.00042356	0.000302341			0.00308595
		1979-02-14	0.271627												0.00644906
		1980-09-26	0.333024		0.317866			0.661924	0.0094874		0.00908484			0.123958	0.0345985		0.0139268			0.0117967	0.000473428		0.00165929			0.00575871
		1982-02-23	0.452712	0.434757			0.825327		0.010496	0.00955905			0.145744		0.0094486	0.0091592			0.0134891		0.000452484	0.000306076			0.0056608
		1982-05-26	0.520798						0.0111569						0.0086003						0.00029187
		1983-08-01	0.551377		0.557612			1.02847	0.0115341		0.0118915			0.172615	0.00907828		0.0135097			0.0110317	0.000316961		0.00166144			0.00758154
		1985-08-08	0.779501	0.815997	0.811223		1.29255	1.29444	0.0156874	0.014881	0.0150927		0.223307	0.210253	0.0466344	0.0134308	0.014399		0.0130057	0.0150647	0.000910653	0.000389328	0.00173011		0.00802005	0.00597931
		1986-02-06	0.825633						0.0152225						0.0391336						0.000381403
		1986-11-12	1.00767						0.0201048						0.0158665						0.000569179
		1987-01-09	0.983067						0.0173225						0.02197						0.000751682
		1987-05-28	1.12521	1.13983	1.12149		1.5893	1.59283	0.0196058	0.0162553			0.213804		0.0212086	0.0418123	0.014399		0.0134267	0.0150647	0.00054284	0.000418615			0.00698763
		1988-06-21	1.30606						0.01968						0.0947835						0.000568748
		1989-04-20	1.47895		1.49465	1.9223		1.97134	0.0211023			0.289635			0.0222681		0.014399	0.0312008		0.0150647	0.000773481			0.00564047
		1990-05-25	1.53898			2.1254			0.0227788			0.303941			0.0403177			0.0239135			0.000594573			0.00559488
		1990-12-18	1.67515	1.75247		2.17211	2.3199		0.0220674	0.0237337		0.312206	0.343598		0.0260962	0.0724354		0.02189	0.0196032		0.000797749	0.000823134		0.00626804	0.00644801
		1991-03-13	1.8651		1.79329	2.22429		2.22742	0.0189674			0.295294			0.0278535		0.0158311	0.0192364		0.0205581	0.000487164			0.00539471
		1991-06-19	1.81228			2.38826			0.0232367			0.328649			0.031333			0.0238693			0.000604104			0.0063307
		1991-07-04	1.85935			2.57919			0.023101			0.350063			0.0306329			0.0535908			0.000592998			0.011749
		1992-01-16	1.93102			2.4535			0.0221359			0.33626			0.0314941			0.0235329			0.000826596			0.00787379
		1992-02-12	1.91788			2.4723			0.0227513			0.354122			0.067655			0.0223122			0.00057019			0.00708328
		1992-04-08	1.92815			2.52027			0.0235824			0.350343			0.0357273			0.0233344			0.000588393			0.00645432
		1992-07-02	1.92648			2.63223			0.0261137			0.360701			0.058019			0.0223805			0.000651953			0.00763257
		1992-09-23	2.05429			2.64547			0.024322			0.360108			0.032118			0.0338674			0.000625718			0.0083611
		1992-09-24	2.05906			2.65517			0.0262625			0.369671			0.0347231			0.0226807			0.000721922			0.0104981
		1993-06-07	2.09934		2.13053	2.73147		2.73835	0.0253126			0.374302			0.0345569		0.0264319	0.0232157		0.0386649	0.000785216			0.00696865
		1993-06-29	2.09927	2.10722		2.76166	2.77929		0.0263421	0.0265242		0.385925	0.392127		0.0348049	0.0408438		0.0327362	0.0234789		0.000657347	0.000875929		0.0075158	0.0112019
		1993-08-11	2.12295			2.70318			0.0251252			0.360091			0.0830498			0.0369416			0.00136558			0.00679529
		1993-09-20	2.04163			2.88196			0.0279636			0.399315			0.0586797			0.051892			0.000837066			0.0191045
		1994-02-11	2.16585		2.22621	2.87656		2.85516	0.0263753		0.0262929	0.383775		0.380876	0.0482631		0.0416935	0.0435015		0.0682919	0.000717936		0.00103672	0.00948417		0.00556043
		1994-03-15	2.04306			2.83157			0.025331			0.38663			0.0547648			0.0272785			0.000639322			0.00784423
		1994-04-27	2.1993			2.8762			0.0260432			0.393966			0.0380181			0.0382408			0.000654994			0.00761946
		1994-06-01	2.23967			2.96153			0.0281604			0.392891			0.0380174			0.0387025			0.000721688			0.0147337
		1994-06-09	2.17589			3.05681			0.0277447			0.392237			0.0410127			0.0326772			0.000998474			0.00743719
		1994-10-05	2.26165			2.99172			0.0302355			0.398567			0.0372281			0.0553321			0.000754965			0.00940138
		1994-12-07	2.28172			3.03238			0.0295376			0.399384			0.0386889			0.0837279			0.00152595			0.0202565
		1995-02-08	2.30202			3.03656			0.0304179			0.406909			0.0403739			0.0311917			0.000826785			0.0097956
		1995-03-13	2.32378			3.0929			0.0288247			0.374447			0.0413837			0.0355129			0.000732437			0.00695389
		1995-04-12	2.31619			3.04969			0.0291469			0.399685			0.0687137			0.026386			0.000878023			0.00727571
		1995-06-13	2.24048		2.37473	3.14045		3.15242	0.0320308		0.0319793	0.408663		0.411193	0.0414245		0.0286994	0.086413		0.0430097	0.000918464		0.00174043	0.00850024		0.00543178
		1995-08-23	2.35972			3.20579			0.0324544			0.420768			0.0796235			0.0687919			0.000876456			0.00772684
		1995-11-23	2.38327			3.23868			0.0316331			0.405683			0.0741562			0.0631086			0.000976155			0.00775897
		1996-02-09	2.46298			3.30445			0.0343862			0.41672			0.0515541			0.0298546			0.00122503			0.0076321
		1996-04-04	2.34918			3.33256			0.0362792			0.423034			0.0409474			0.0284808			0.00108949			0.0142258
		1996-05-28	2.38731			3.37098			0.0340313			0.412175			0.0512583			0.0302508			0.000886979			0.00785987
		1996-08-21	2.37737			3.40858			0.0392877			0.417865			0.0429213			0.0309393			0.00123134			0.00818081
		1996-11-20	2.42581			3.4985			0.0390223			0.418455			0.049727			0.0300461			0.00112831			0.00785811
		1997-01-07	2.51829		2.46341	3.44415		3.37032	0.038237		0.0367414	0.424611		0.414882	0.0436159		0.0331935	0.0338256		0.0297041	0.00101957		0.00108488	0.00797654		0.00343272
		1997-02-26	2.46541			3.50108			0.0381864			0.413222			0.0435981			0.0300816			0.00100497			0.00847344
		1997-05-30	2.47476			3.49437			0.0404828			0.423286			0.0458641			0.0339646			0.0018438			0.00786286
		1997-07-15	2.45165			3.55096			0.0425442			0.412782			0.0414171			0.0334484			0.00139507			0.00831471
		1998-03-05	2.5729			3.60764			0.0413855			0.412958			0.0475818			0.0358704			0.00163146			0.00780793
		1998-04-15	2.52895			3.54121			0.0402468			0.418876			0.0850817			0.030181			0.00106957			0.0082765
		1998-05-20	2.54245			3.64366			0.0417878			0.418832			0.0452461			0.0572104			0.00171661			0.00901562
		1998-06-16	2.55511			3.63572			0.0423272			0.428944			0.0478055			0.062728			0.00125278			0.00850236
		1998-07-01	2.58194			3.70336			0.0437258			0.426349			0.047371			0.033655			0.00110869			0.00785984
		1998-08-29	2.56281			3.68975			0.0454727			0.423511			0.0422358			0.0394426			0.00225494			0.00783332
		1998-09-24	2.68462			3.7304			0.0457249			0.428887			0.0540683			0.0324855			0.00130802			0.00868094
		1998-10-15	2.65952			3.76752			0.0463713			0.426385			0.0443915			0.0434833			0.00126473			0.00772755
		1998-11-27	2.66817			3.77843			0.0443005			0.432051			0.0625152			0.0319315			0.00156442			0.00821785
		1999-02-17	2.56688			3.75226			0.0429819			0.429695			0.0622693			0.0541255			0.00115431			0.0083788
		1999-03-04	2.63611			3.71225			0.0423477			0.418968			0.0624176			0.0314132			0.00112235			0.00879151
		1999-04-13	2.56223			3.70522			0.0419373			0.421093			0.0540819			0.0402031			0.00230235			0.00762938
		1999-05-13	2.68192			3.9214			0.0454292			0.424492			0.0472336			0.0561322			0.00210503			0.0128045
		1999-06-21	2.67914		2.63001	3.73032		3.7777	0.044306		0.0454428	0.415194		0.422814	0.0462285		0.0331935	0.0507441		0.0360438	0.00115119		0.00108488	0.00899989		0.00343272
		1999-08-16	2.63476			3.813			0.0462304			0.428488			0.065585			0.040257			0.00132517			0.00778031
		1999-09-24	2.69164			3.90652			0.0468244			0.439637			0.0605974			0.0333227			0.00123133			0.00860069
		1999-10-18	2.65255			3.87791			0.0448279			0.415988			0.0503617			0.0348812			0.00122267			0.00759387
		1999-11-15	2.64506			3.79508			0.0438195			0.413169			0.0740774			0.0337847			0.00112406			0.00749339
		1999-12-17	2.663			3.86848			0.0432075			0.406526			0.0492764			0.0333687			0.00109724			0.00752689
		2000-01-20	2.6325			3.90037			0.0424682			0.430154			0.053553			0.0388557			0.00119924			0.00907547
		2000-02-23	2.70327		2.70945	3.91198		3.92836	0.0438673			0.419802			0.0522087		0.0331935	0.0367737		0.0382357	0.00113163			0.00819052
		2000-09-29			2.71598			3.95807			0.0471745			0.423576			0.0317944			0.0524093			0.000778821			0.00604133
		2001-04-27	2.689		2.75131	4.03137		3.99821	0.0455854		0.0450643	0.438637		0.427948	0.0585805		0.0331935	0.0429054		0.0404433	0.00118238		0.00108488	0.00937249		0.00343272
		2001-06-15	2.7843			3.96366			0.0473777			0.392663			0.0473035			0.0340455			0.00118904			0.010421
		2001-07-15	2.7512			4.03681			0.044915			0.43566			0.0614532			0.04158			0.0011691			0.00882946
		2001-08-08	2.72912			4.07149			0.0447112			0.425761			0.0525852			0.0371902			0.0012818			0.011679
		2001-09-04	2.71576			4.00398			0.0437624			0.426515			0.0449282			0.0545301			0.00171847			0.00901925
		2001-10-18	2.68726			4.04551			0.0442198			0.42847			0.0929462			0.0397782			0.00110332			0.0111929
		2001-11-13	2.7965			4.02921			0.0444012			0.428507			0.0573716			0.0492864			0.0011913			0.00939192
		2001-12-11	2.82443		2.79486	4.03452		4.13162	0.0426109			0.431702			0.0476271		0.0331935	0.0433102		0.0245495	0.00108161			0.00953397
		2002-06-20			2.82703			4.08329			0.0440649			0.423829			0.0317944			0.0434447			0.000778821			0.00604133
		2003-01-21		2.79257			4.14865			0.0398093			0.421233			0.0461402			0.0361202			0.00156527			0.0101774
		2003-03-13		2.83087			4.09396			0.0395063			0.430633			0.0468962			0.0448984			0.00107817			0.0103341
		2003-04-15		2.82617			4.08856			0.0399876			0.423567			0.0578798			0.0407868			0.000990698			0.0110672
		2003-05-21		2.81684	2.85785		4.15961			0.0403244	0.0383131		0.420442	0.423614		0.0726931	0.0331935		0.035246	0.0131625		0.00185672	0.00108488		0.0104498	0.00343272
		2003-09-18		2.86037			4.17606			0.0398326			0.428415			0.0632912			0.124145			0.00155159			0.00805538
		2003-10-08		2.83707			4.15497			0.0400117			0.429222			0.0656852			0.0497891			0.00112862			0.0128132
		2003-12-13		2.84289			4.134			0.0389938			0.434062			0.0577065			0.0889357			0.00208269			0.00787904
		2004-01-15		2.95229			4.18785		0.0383186	0.0391267		0.419293	0.425282			0.0548124			0.0386163		0.00130879	0.00123779		0.0133395	0.0113652
		2004-05-19		2.92343			4.20617			0.0373783			0.430724			0.0535708			0.0360145			0.00105044			0.0101584
		2004-06-30		2.88231	2.92908		4.23249			0.0394237			0.421387			0.0493884	0.0331935		0.112315	0.0162283		0.00208477			0.0087247
		2004-08-06		2.93818			4.24957			0.039381			0.423732			0.051525			0.0618297			0.00286637			0.0178562
		2004-09-01		2.92631	2.92129		4.22777	4.1981		0.0363085	0.0380057		0.435007	0.421099		0.0525636	0.0235389		0.0591913	0.0415071		0.00197657	0.00060076		0.0147919	0.00673348
		2004-12-16			2.96885			4.18732									0.0230497			0.0154229
		2005-01-17			2.9825			4.22381									0.0865426			0.0270012
		2005-02-10			2.96987			4.17232									0.126167			0.0939374
		2005-03-02			2.97246			4.19878									0.029511			0.0282392
		2005-04-06			2.94299			4.17873			0.034088			0.413603			0.0477237			0.0300655			0.00112431			0.00339356
		2005-10-03			2.98083			4.22645									0.0219912			0.0172858
		2006-02-10			3.01521			4.17336									0.0358353			0.0559396
		2006-08-23			3.01188			4.19497			0.0331021			0.412568			0.0475965			0.0344091			0.00083288			0.00601917
		2006-12-11			2.98471			4.19237									0.0933808			0.0282005
		2007-05-08			2.94974			4.18823									0.0373449			0.030872
		2007-06-20			3.05265			4.22103									0.0442497			0.0424857
		2007-07-05			3.08248			4.19764			0.0291825			0.408262			0.0993832			0.0303042			0.00112431			0.00339356
		2007-08-03			3.01139			4.14601									0.0657395			0.0333834
		2007-09-20			3.0973			4.2009									0.138191			0.0367382
		2008-05-07			3.05613			4.16364									0.0370075			0.0306134
		2008-06-13			3.0492			4.13008			0.0269625			0.414928			0.0652623			0.0647738			0.00083288			0.00601917
		2008-07-11			3.12136			4.16338									0.0586179			0.0289352
		2008-08-01			3.08791			4.13845									0.0357952			0.0620248
		2009-03-06			3.08467			4.11442			0.0243593			0.404939			0.0232907			0.0176989			0.00113828			0.0021254
		2009-07-27			3.10218			4.12133			0.0234556			0.399812			0.0116424			0.0205257			0.0011589			0.00305037
		2010-12-10			3.15319			4.02588			0.020313			0.399189			0.0225664			0.0131025			0.000751868			0.00351387
		2011-02-08			3.16256			3.99945			0.0198111						0.0198279			0.0405212			0.00145249
		2011-03-17			3.11993			3.97616			0.0202711			0.392971			0.0408913			0.0400656			0.00101125			0.0062018
		2011-04-20			3.15606			3.97423			0.0195129						0.0262188			0.0283326			0.00131501
		2011-05-26			3.1594			3.97573			0.0198472						0.0292891			0.0302299			0.00131439
		2011-06-21			3.14837			3.98253			0.0203725			0.392865			0.0337654			0.0389113			0.000967971			0.0062018

## Sheet: Table S3
Table S3. Model derived annual global emissions (Gg) for the halons from 1978 - 2010. Based on the reported lifetimes of Montzka and Reimann (2011).
			Model Derived Global Emissions [Gg]				Emission Uncertainty [Gg]
		Year	H-1301	H-1211	H-1202	H-2402	H-1301	H-1211	H-1202	H-2402
		1978	1.54	3.27	0.16	0.87	0.08	0.17	0.01	0.05
		1979	1.73	4.05	0.19	0.91	0.09	0.21	0.01	0.05
		1980	1.86	4.79	0.2	0.99	0.1	0.24	0.01	0.05
		1981	2.08	4.99	0.22	1.07	0.11	0.25	0.01	0.06
		1982	2.34	5.28	0.25	1.13	0.12	0.27	0.01	0.06
		1983	2.68	5.81	0.26	1.19	0.14	0.29	0.01	0.06
		1984	3.25	6.64	0.29	1.25	0.17	0.34	0.02	0.07
		1985	4.3	7.31	0.35	1.32	0.23	0.37	0.02	0.07
		1986	5.67	8.32	0.37	1.36	0.3	0.42	0.02	0.07
		1987	5.95	8.13	0.38	1.4	0.31	0.41	0.02	0.07
		1988	5.72	8.43	0.39	1.6	0.3	0.43	0.02	0.09
		1989	4.93	8.6	0.42	1.64	0.26	0.44	0.02	0.09
		1990	4.47	9.17	0.44	1.74	0.24	0.47	0.02	0.09
		1991	4.2	10.14	0.45	1.77	0.22	0.51	0.03	0.09
		1992	4.37	10.24	0.48	1.75	0.23	0.52	0.03	0.09
		1993	4.29	10.34	0.52	1.62	0.23	0.52	0.03	0.09
		1994	3.74	11.1	0.71	1.42	0.2	0.56	0.04	0.08
		1995	2.77	12.71	0.8	1.15	0.15	0.64	0.04	0.06
		1996	2.93	10.59	0.82	0.99	0.15	0.54	0.05	0.05
		1997	2.9	10.11	0.84	1.05	0.15	0.51	0.05	0.06
		1998	2.83	10	0.83	1.05	0.15	0.51	0.05	0.06
		1999	2.72	10.59	0.79	1.05	0.14	0.54	0.04	0.06
		2000	2.29	8.82	0.74	1.05	0.12	0.45	0.04	0.06
		2001	1.93	9.51	0.66	0.87	0.1	0.48	0.04	0.05
		2002	2.43	8.13	0.59	0.82	0.13	0.41	0.03	0.04
		2003	2.61	9.21	0.57	0.8	0.14	0.47	0.03	0.04
		2004	2.86	8.43	0.49	0.78	0.15	0.43	0.03	0.04
		2005	1.86	7.07	0.44	0.74	0.1	0.36	0.02	0.04
		2006	2.13	6.66	0.38	0.72	0.11	0.34	0.02	0.04
		2007	1.77	6.22	0.36	0.71	0.09	0.32	0.02	0.04
		2008	1.85	6.13	0.3	0.73	0.1	0.31	0.02	0.04
		2009	1.85	5.64	0.27	0.73	0.1	0.29	0.02	0.04
		2010	1.85	4.95	0.26	0.72	0.1	0.25	0.01	0.04

## Sheet: Table S4
Table S4. Model derived annual global emissions (Gg) for the halons from 1978 – 2010. Based on the lifetimes calculated in this work (See Section 8).
			Model Derived Global Emissions [Gg]				Emission Uncertainty [Gg]
		Year	H-1301	H-1211	H-1202	H-2402	H-1301	H-1211	H-1202	H-2402
		1978	1.51724	3.24426	0.15	0.86	0.18	0.08	0.05	0.01
		1979	1.70443	4.06291	0.19	0.9	0.22	0.09	0.05	0.01
		1980	1.84167	4.7906	0.2	0.93	0.26	0.09	0.05	0.01
		1981	2.06975	4.99273	0.22	1	0.28	0.11	0.05	0.01
		1982	2.27354	5.38689	0.24	1.07	0.3	0.11	0.06	0.01
		1983	2.563	6.27629	0.25	1.16	0.35	0.12	0.06	0.01
		1984	2.74607	7.04499	0.28	1.3	0.4	0.13	0.07	0.01
		1985	4.37175	7.59657	0.34	1.42	0.44	0.2	0.07	0.02
		1986	5.92756	8.64571	0.36	1.5	0.5	0.29	0.08	0.02
		1987	6.15869	8.364	0.37	1.56	0.48	0.3	0.08	0.02
		1988	5.68557	8.67486	0.38	1.8	0.5	0.29	0.1	0.02
		1989	4.90033	9.09036	0.4	1.85	0.52	0.25	0.1	0.02
		1990	4.35424	9.50587	0.43	2.02	0.56	0.23	0.11	0.02
		1991	4.09123	9.92137	0.44	1.99	0.62	0.21	0.11	0.02
		1992	3.96459	10.3369	0.47	1.79	0.62	0.21	0.09	0.02
		1993	4.07175	10.7524	0.5	1.59	0.63	0.21	0.08	0.03
		1994	3.62366	11.5429	0.69	1.49	0.68	0.19	0.08	0.04
		1995	2.55035	13.2095	0.77	1.26	0.78	0.13	0.07	0.04
		1996	2.56866	10.9905	0.79	1.16	0.65	0.14	0.06	0.04
		1997	2.66613	10.5143	0.81	1.21	0.62	0.14	0.06	0.04
		1998	2.51275	10.6095	0.81	1.21	0.62	0.13	0.06	0.04
		1999	2.40805	11.2095	0.8	1.21	0.66	0.13	0.06	0.04
		2000	2.06913	9.35238	0.75	1.21	0.55	0.11	0.06	0.04
		2001	1.74856	10.2762	0.64	1.03	0.6	0.09	0.05	0.03
		2002	2.20513	8.8	0.58	0.98	0.52	0.12	0.05	0.03
		2003	2.36056	10.3	0.55	0.96	0.62	0.12	0.05	0.03
		2004	2.58398	9.00817	0.48	0.95	0.57	0.13	0.05	0.03
		2005	1.68056	8.03669	0.46	0.91	0.48	0.09	0.05	0.02
		2006	1.89447	7.06522	0.37	0.89	0.45	0.1	0.05	0.02
		2007	1.57079	6.73087	0.35	0.88	0.43	0.08	0.05	0.02
		2008	1.63743	6.63409	0.28	0.9	0.42	0.09	0.05	0.01
		2009	1.63743	6.09738	0.27	0.9	0.39	0.09	0.05	0.01
		2010	1.63743	5.3495	0.26	0.89	0.34	0.09	0.05	0.01
